# Supplementary material for: Molar mass and composition effects on the thermal stability of functional P(S-r-MMA) random copolymers for nanolithographic applications
Source: Royal Society of Chemistry journal article supplement (doi:10.1039/c7me00064b), 2017-01-01
Supplement: c7me00064b1.pdf [file c7me00064b1.pdf]

## Supporting Information

### **Molar Mass and Composition Effects on the Thermal Stability of Functional P(S-*r*-MMA) Random Copolymers for Nanolithographic Applications**

Diego Antonioli,<sup>a</sup> Valentina Gianotti,<sup>a</sup> Katia Sparnacci,<sup>a</sup> Michele Laus,<sup>a</sup> Marco Clericuzio,<sup>a</sup> Tommaso Jacopo Giammaria,<sup>ab</sup> Gabriele Seguini<sup>b</sup> and Michele Perego<sup>b</sup>

---

<sup>a</sup>*Dipartimento di Scienze e Innovazione Tecnologica (DISIT), Università del Piemonte Orientale "A. Avogadro", Viale T. Michel 11, 15121 Alessandria, Italy; INSTM, Udr Alessandria*

---

<sup>b</sup>*Laboratorio MDM, IMM-CNR, Via C. Olivetti 2, 20864 Agrate Brianza (MB), Italy*

\* Corresponding author e-mail: [michele.laus@uniupo.it](mailto:michele.laus@uniupo.it), [michele.perego@mdm.imm.cnr.it](mailto:michele.perego@mdm.imm.cnr.it)

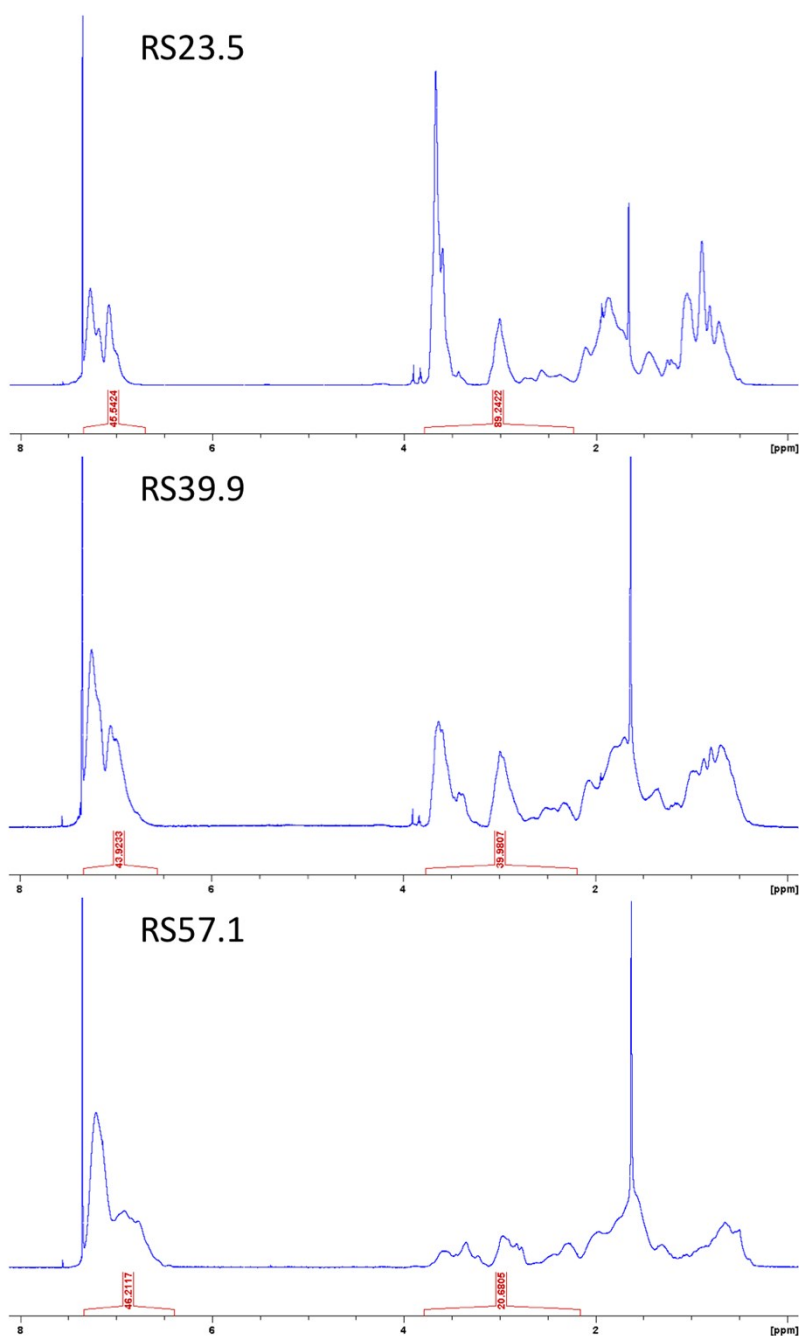

Figure S1.  $^1\text{H}$  NMR spectra of samples R23.5, RS39.9 and RS57.1 in  $\text{CDCl}_3$ .

The copolymer composition was evaluated by  $^1\text{H}$  NMR in  $\text{CDCl}_3$ . As a typical example Figure S1 reports the  $^1\text{H}$  NMR spectra of samples R23.5 (Mn 13100, PDI 1.23), RS39.9 (Mn 14400, PDI 1.33) and RS57.1 (Mn 13200, PDI 1.36). The molar fraction of styrene was obtained from the peak intensity of the aromatic protons (6.5-7.3 ppm, 5H, integral value = S2) for styrene units and of the -OCH<sub>3</sub> protons (2.5-3.8 ppm, 3H, integral value = S1) for methyl methacrylate units using the following equation:

$$S(\%) = \frac{S2/5}{S2/5 + S1/3}$$

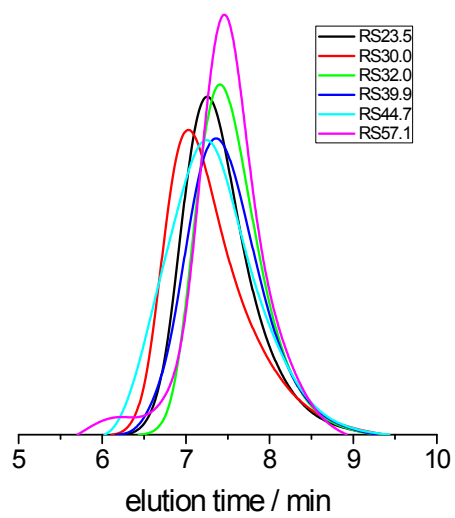

Figure S2. SEC curves of random copolymers RSn prepared by ARGET-ATRP.
